# Supplementary material for: The Association Between the Kyphosis Angle and Physical Performance in Community-Dwelling Older Adults
Source: PubMed Central journal article supplement — J Gerontol A Biol Sci Med Sci. 2022 Jun 1;77(11):2298–305. doi: 10.1093/gerona/glac113 (PMC9678197; doi:10.1093/gerona/glac113), 2022-06-01
Supplement: glac113_suppl_supplementary_figure.pdf [file glac113_suppl_supplementary_figure.pdf]

**eFigure 1: the number of participants per physical performance test**

Vertebral Fracture Assessment  
(VFA) available  
N = 1222

Baseline analyses:

- total performance score (n = 1212)
- tandem stand (n= 1218)
- hand grip strength (n= 1208)

Analyses after 2 years follow-up:

- total performance score (n = 1116)
- tandem stand (n= 1124)
- hand grip strength (n= 1146)

Analyses with change of physical performance over time:

- total performance score (n = 1108)
- tandem stand (n= 1122)
- hand grip strength (n= 1137)

Analysis with change of Cobb angle over time:

- total performance score (n = 1071)
- tandem stand (n= 1077)
- hand grip strength (n= 1096)
